# Supplementary material for: Synthesis of Ti3C2Tx/MnO2 composites for synergistic catalytic/photothermal-based bacterial inhibition
Source: Royal Society of Chemistry journal article supplement (doi:10.1039/d2na00923d), 2023-01-01
Supplement: d2na00923d1.pdf [file d2na00923d1.pdf]

Supporting Information

**Synthesis of  $\text{Ti}_3\text{C}_2\text{T}_x/\text{MnO}_2$  composites for synergistic catalytic/photothermal-based bacterial inhibition**

Ting Hu,<sup>a</sup> Zhilong Xu,<sup>a</sup> Peiyang Zhang,<sup>b</sup> Lei Fan,<sup>\*a</sup> Juqun Xi,<sup>\*b</sup> Jie Han<sup>a</sup>  
and Rong Guo<sup>a</sup>

a. School of Chemistry and Chemical Engineering, Yangzhou University,  
Yangzhou 225002, China.

b. Department of Pharmacology, Institute of Translational Medicine,  
School of Medicine, Yangzhou University, Yangzhou 225002, China.

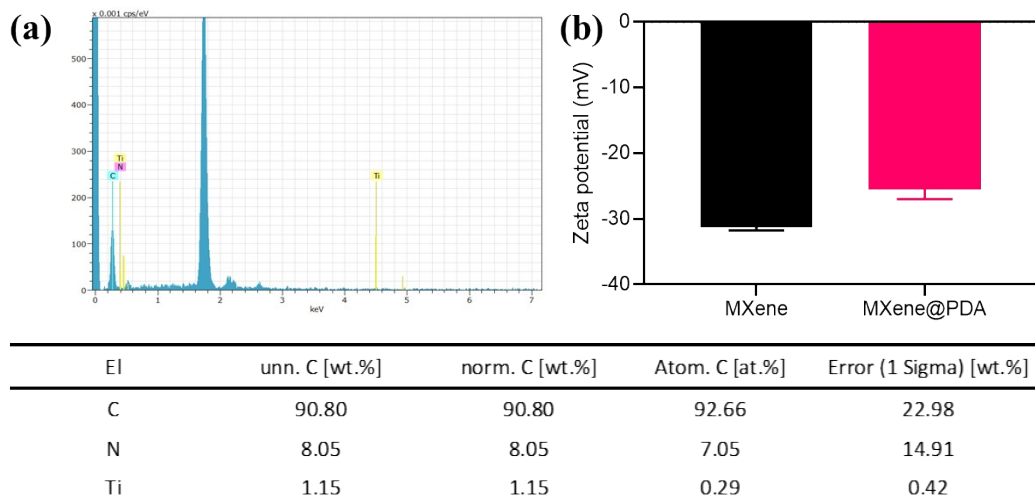

Fig. S1 (a) EDX image of  $Ti_3C_2T_x@PDA$  ; (b) The Zeta potentials of  $Ti_3C_2T_x$  and  $Ti_3C_2T_x@PDA$ .

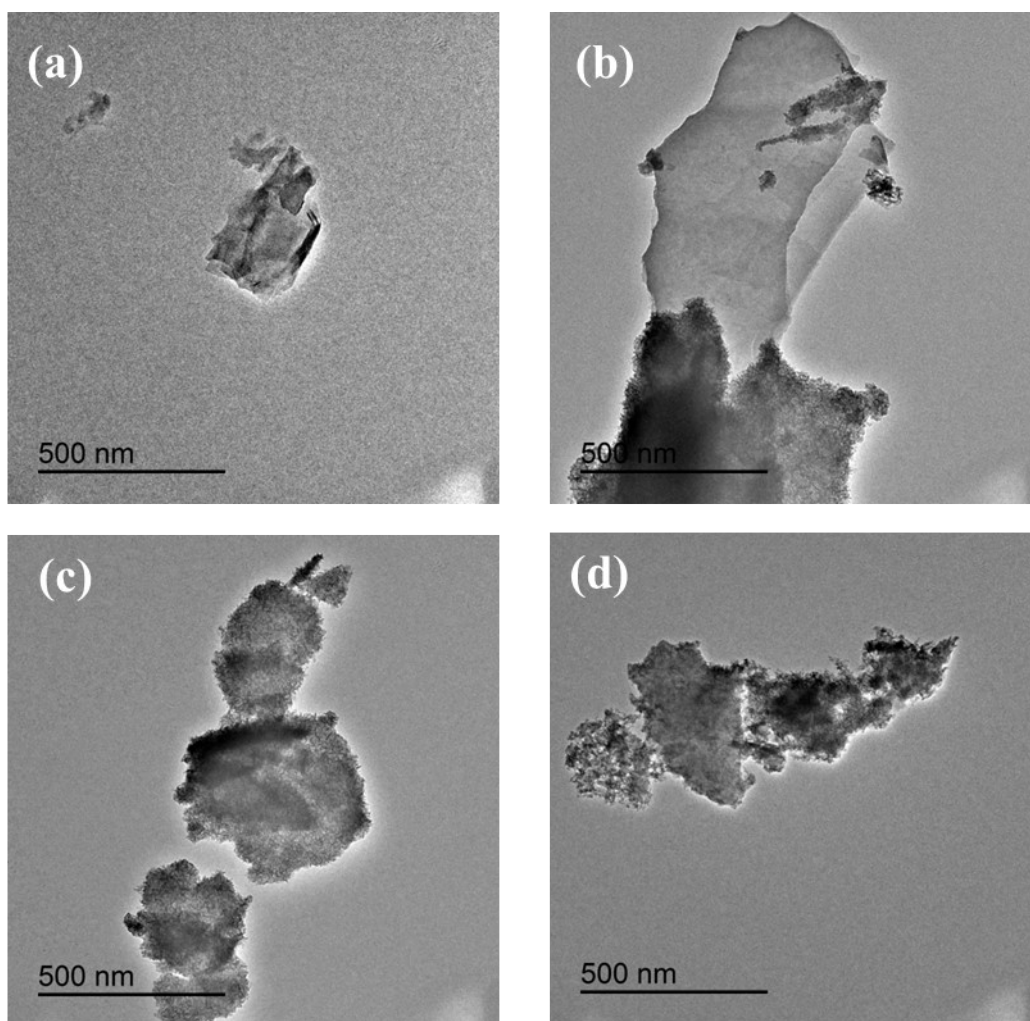

Fig. S2 TEM images of  $Ti_3C_2T_x@PDA$ (a), S1(b), S2(c) and S3(d).

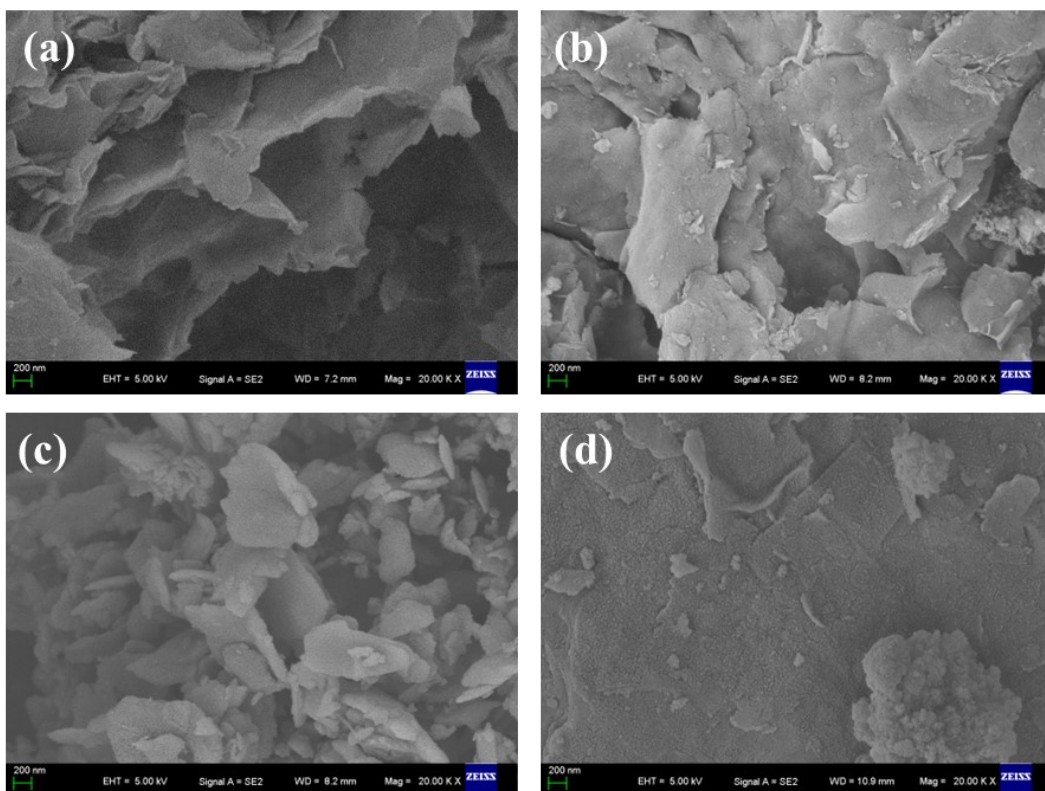

Fig. S3 SEM images of  $Ti_3C_2T_x@PDA$ (a), S1(b), S2(c) and S3(d).

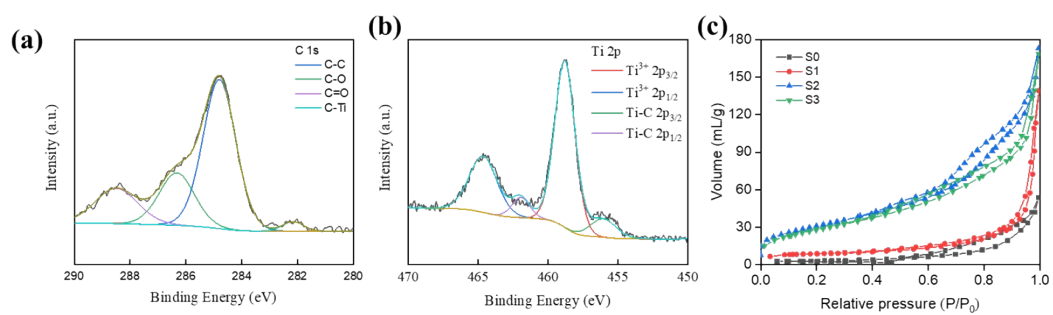

Fig. S4 (a,b) XPS spectra of C 1s and Ti 2p of S2. (c) Nitrogen adsorption-desorption isotherms of S0, S1, S2 and S3.

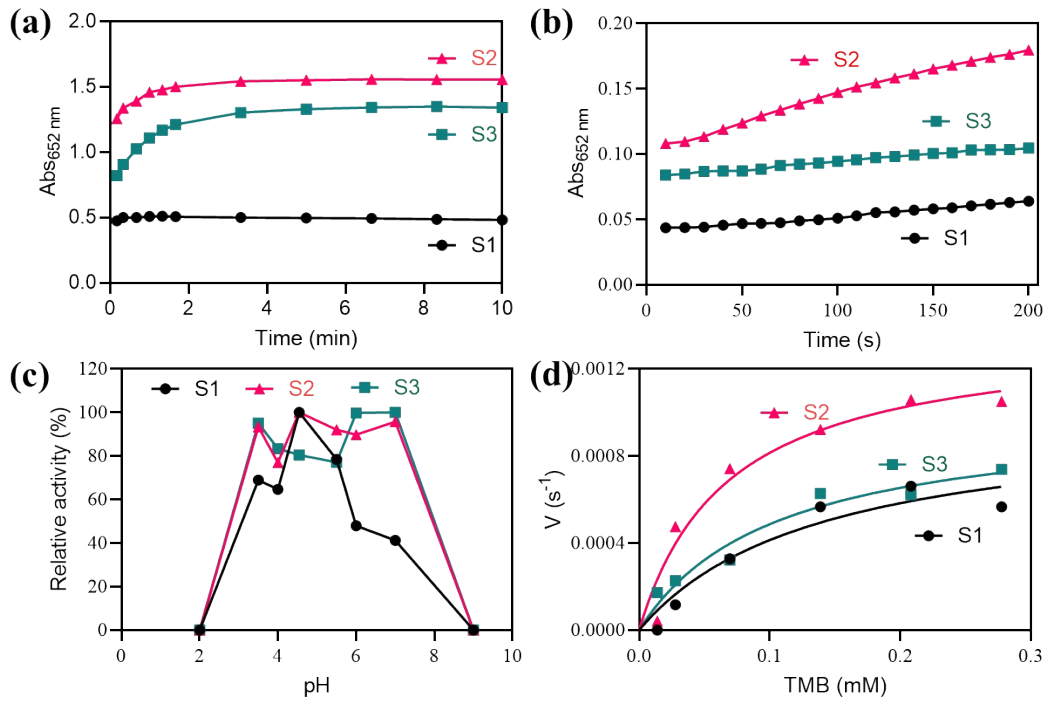

**Fig. S5** (a, b) Comparison of the oxidase-like and peroxidase-like catalytic activities of S1, S2 and S3; (c) pH effect on the oxidase-like catalytic activity of S1, S2 and S3. (d) Concentration versus reaction rate for TMB as a substrate (peroxidase-like catalytic activities).

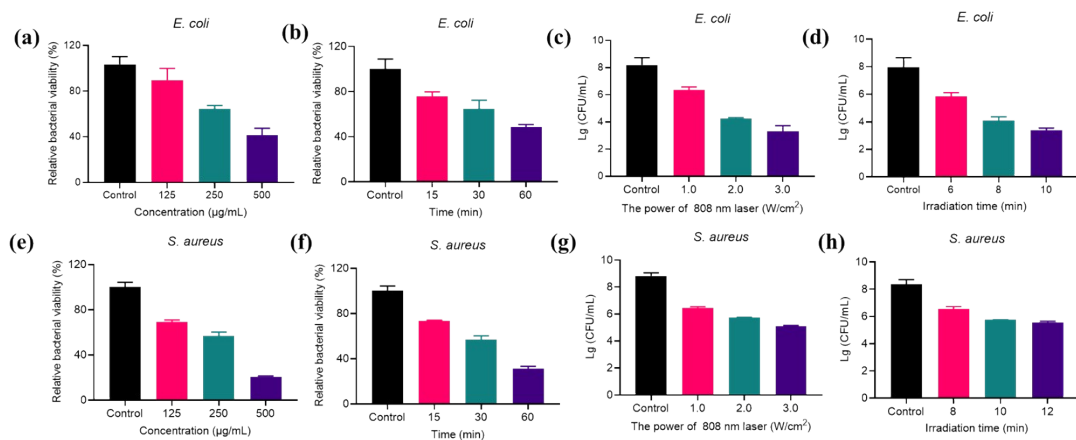

**Fig. S6** Bacterial survival rate of *E. coli* and *S. aureus* cultured in S2; (a, e) different concentrations; (b, f) different reaction times; (c, g) different lighting powers; (d, h) different lighting time; sample concentration was 250 µg/mL; reaction time was 30 minutes.

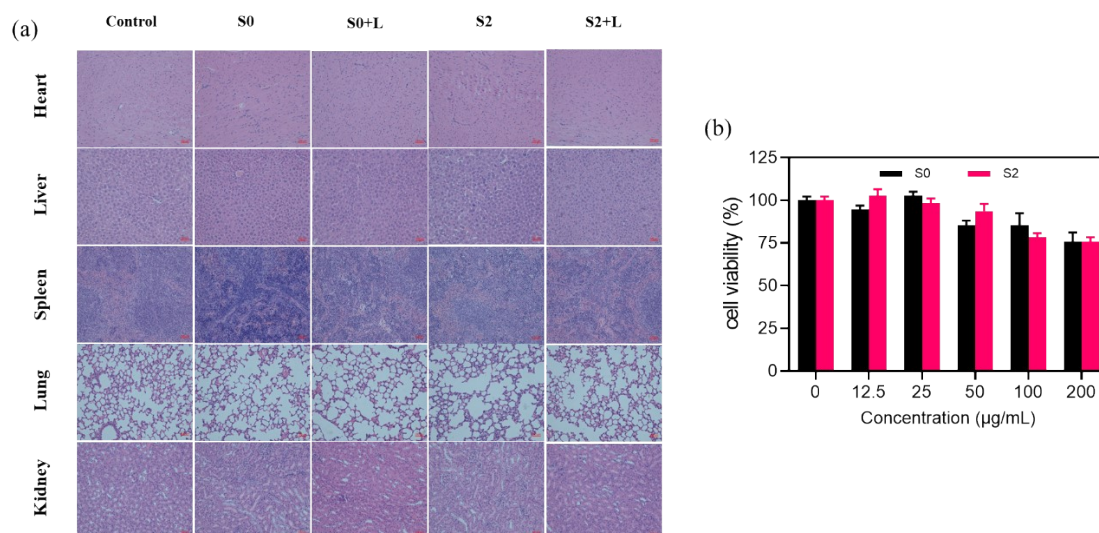

**Fig. S7** (a) After 12 days of wound treatment, H&E staining analysis of the main organs (heart, liver, spleen, lung, and kidney); scale bar is 200 µm. (b) The survival rate of L02 cells after incubation with S0 and S2 nanoparticles was determined by CCK-8 colorimetric method.

**Table S1.** XPS measurements of the elements in S2 samples

| Sample | Ti (%) | C (%) | Mn (%) | O (%) | N (%) | F (%) |
|--------|--------|-------|--------|-------|-------|-------|
| S2     | 3.21   | 10.12 | 45.16  | 32.69 | /     | 8.82  |

**Table S2.** Specific surface area of S0, S1, S2 and S3

| Sample | BET surface area<br>(m <sup>2</sup> g <sup>-1</sup> ) |
|--------|-------------------------------------------------------|
| S0     | 10.02                                                 |
| S1     | 27.52                                                 |
| S2     | 112.53                                                |
| S3     | 102.38                                                |

**Table S3.** Kinetic parameters of oxidase-like catalytic reactions using TMB as substrate

| Catalyst | [E]( $\mu\text{g}\times\text{mL}^{-1}$ ) | Substrate | K <sub>m</sub> (mM) | V <sub>max</sub> (10 <sup>-8</sup> M $\times$ s <sup>-1</sup> ) | V <sub>max</sub> /K <sub>m</sub> (10 <sup>-5</sup> $\times$ s <sup>-1</sup> ) |
|----------|------------------------------------------|-----------|---------------------|-----------------------------------------------------------------|-------------------------------------------------------------------------------|
| S1       | 15                                       | TMB       | 0.0031              | 0.13                                                            | 41.94                                                                         |
| S2       | 15                                       | TMB       | 0.1044              | 8.07                                                            | 77.30                                                                         |
| S3       | 15                                       | TMB       | 0.2394              | 8.41                                                            | 35.13                                                                         |

**Table S4.** Kinetic parameters of peroxidase-like catalytic reactions using H<sub>2</sub>O<sub>2</sub> and TMB as substrates

| Catalyst | [E]( $\mu\text{g}\times\text{mL}^{-1}$ ) | K <sub>m</sub> (mM)           |        | V <sub>max</sub> (10 <sup>-8</sup> M $\times$ s <sup>-1</sup> ) |      | V <sub>max</sub> /K <sub>m</sub> (10 <sup>-5</sup> $\times$ s <sup>-1</sup> ) |       |
|----------|------------------------------------------|-------------------------------|--------|-----------------------------------------------------------------|------|-------------------------------------------------------------------------------|-------|
|          |                                          | H <sub>2</sub> O <sub>2</sub> | TMB    | H <sub>2</sub> O <sub>2</sub>                                   | TMB  | H <sub>2</sub> O <sub>2</sub>                                                 | TMB   |
| S1       | 15                                       | 0.9721                        | 0.1388 | 0.54                                                            | 2.53 | 0.56                                                                          | 18.23 |
| S2       | 15                                       | 0.5876                        | 0.0678 | 9.67                                                            | 3.51 | 16.46                                                                         | 51.78 |
| S3       | 15                                       | 0.1954                        | 0.1045 | 0.97                                                            | 2.55 | 4.96                                                                          | 24.40 |
